# Supplementary material
Source: PubMed Central journal article supplement (PMC3720080)

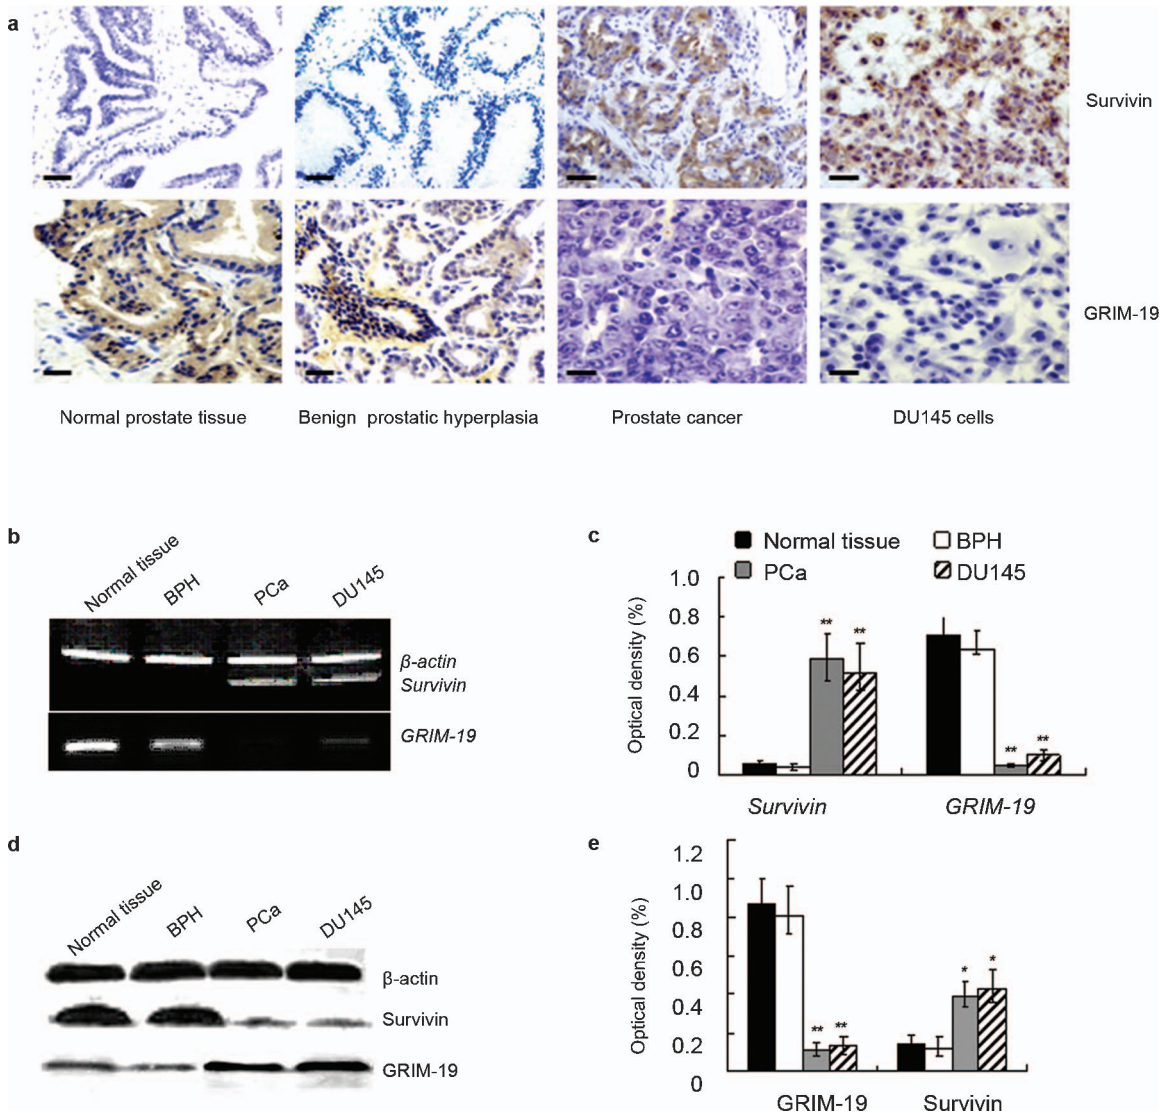

**Supplemental Figure 1** Survivin and GRIM-19 expression in normal prostatic tissue, benign prostatic hyperplasia, prostatic cancer tissue and DU145 cells. **(a)** Immunohistochemical analysis of Survivin and GRIM-19 expression (scale bar=20  $\mu$ m). **(b)** RT-PCR analysis of *Survivin* and *GRIM-19* mRNA. **(c)** The quantified *GRIM-19* and *Survivin* level. **(d)** GRIM-19 and Survivin protein level revealed by Western blot. **(e)** The quantified GRIM-19 and Survivin protein level. Optical density was expressed as mean  $\pm$  s.e., \* $P$ <0.05, \*\* $P$ <0.01 versus normal prostate. GRIM-19, gene associated with retinoid-interferon-induced mortality-19; RT-PCR, reverse transcription PCR.

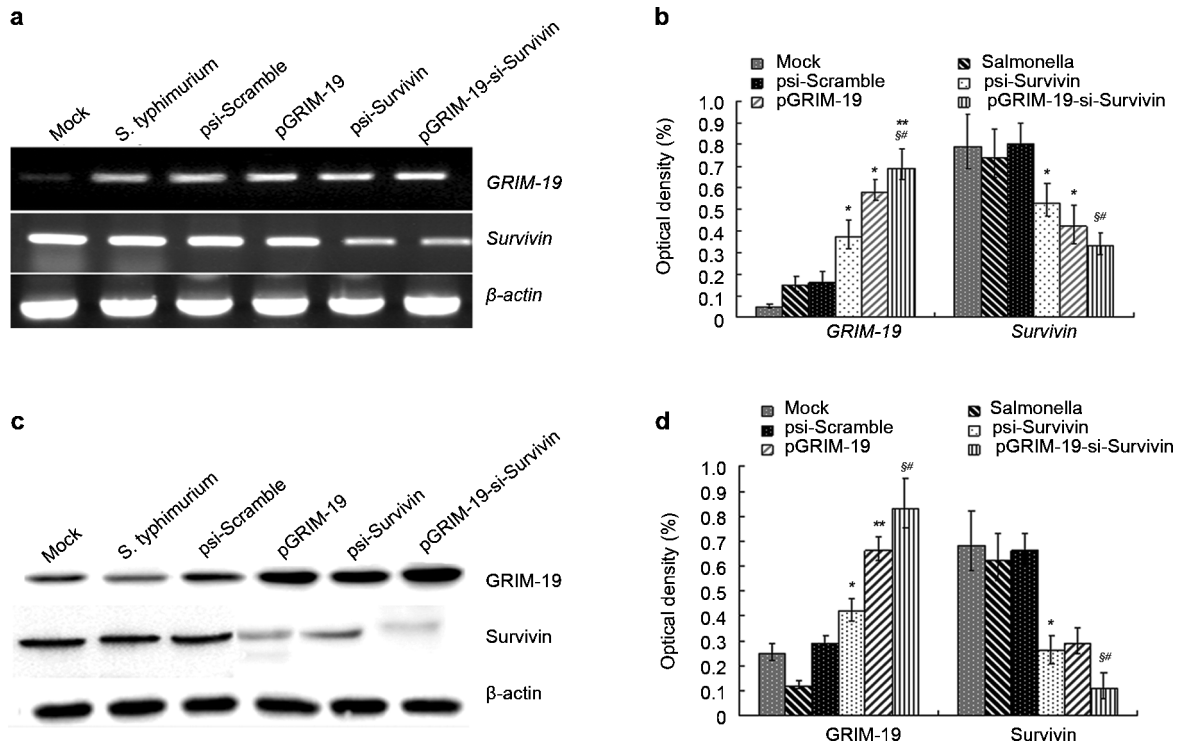

**Supplemental Figure 2** RT-PCR and Western blot analyses of *Survivin* and *GRIM-19* mRNA and corresponding GRIM-19 protein in DU145 xenografts treated with attenuated *Salmonella* carrying different treatment plasmids. (a) RT-PCR analyses for *Survivin* and *GRIM-19* mRNA levels in xenografts treated with attenuated *Salmonella* carrying various treatment plasmids after 2× intraperitoneal injections. (b) Quantified *Survivin* and *GRIM-19* mRNA levels in xenografts post-treatment. (c) Western blot analyses of *Survivin* and *GRIM-19* protein levels in xenografts post-treatment. (d) Quantified *Survivin* and *GRIM-19* protein levels. Optical density was expressed as mean ± s.e. (\* $P < 0.05$ , \*\* $P < 0.01$  versus Mock groups; # $P < 0.05$  versus psi-Survivin; § $P < 0.05$  versus pGRIM-19 groups). GRIM-19, gene associated with retinoid-interferon-induced mortality-19; RT-PCR, reverse transcription PCR.

**Supplemental Table 1 PCR primers**

| <i>Gene</i>      | <i>The sequences of the primers</i>                                         | <i>Length (bp)</i> |
|------------------|-----------------------------------------------------------------------------|--------------------|
| <i>Stat3</i>     | Forward: 5'-TTGCCAGTTGTGGTGATC-3' Reverse: 5'-AGACCCAGAAGGAGCCGC-3'         | 315                |
| <i>Caspase3</i>  | Forward: 5'-AGAAGCTGGACTGTGGCATTG-3' Reverse: 5'-TTCTGTTGCCACCTTTTCG-3'     | 241                |
| <i>Cyclin D1</i> | Forward: 5'-CCTGTGCTGCGAAGT GGAAA-3' Reverse: 5'-GATGGAGTTGTCGGTGTAGAT-3'   | 382                |
| <i>VEGF</i>      | Forward: 5'-GGATGTCTATCAGCGCAGCTAC-3' Reverse: 5'-TCACCGCCTCGGCTTGTCACAT-3' | 454                |
| <i>c-Myc</i>     | Forward: 5'-CTGCTGCCA AGAGGGTCA-3' Reverse: 5'-CGTTTCCGCAACAAGTCC-3'        | 310                |
| <i>BcL-xL</i>    | Forward: 5'-ACAGCTGGTGGTTGACTTTCT-3' Reverse: 5'-CCGGAAGAGTTCATTCACTAC-3'   | 379                |

Abbreviations: BcL-xL, B-cell lymphoma xL; Stat3, signal transducer and activator of transcription 3; VEGF, vascular endothelial growth factor.

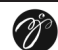

**Supplemental Table 2 Immunohistochemical analysis of Survivin expression in normal prostatic tissue, benign prostatic hyperplasia tissue and prostatic cancer tissue**

| <i>Tissue type</i>           | <i>n</i> | <i>Low</i> | <i>Moderate</i> | <i>Strong</i> | <i>Negative</i> | <i>expression (%)</i> |
|------------------------------|----------|------------|-----------------|---------------|-----------------|-----------------------|
| Normal prostatic tissue      | 16       | 1          | 0               | 0             | 15              | 6.15                  |
| Benign prostatic hyperplasia | 22       | 3          | 1               | 0             | 18              | 18.18                 |
| Prostatic cancer tissue      | 32       | 3          | 6               | 20            | 3               | 90.62                 |

$\chi^2 = 42.261$ ,  $P < 0.01$  represent significant difference among the three groups.

There is no obvious difference between normal prostatic tissue group and benign prostatic hyperplasia ( $\chi^2 = 0.0005$ ,  $P > 0.05$ ), while there is a significant statistical difference between normal prostatic tissue group and prostatic cancer tissue ( $\chi^2 = 18.9$ ,  $P < 0.01$ ). There is also a significant difference between benign prostatic hyperplasia and prostatic cancer tissue ( $\chi^2 = 25.82$ ,  $P < 0.01$ ).

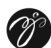

**Supplemental Table 3 Immunohistochemical analysis of GRIM-19 expression in normal prostatic tissue, benign prostatic hyperplasia and prostatic cancer tissue**

| <i>Tissue type</i>           | <i>n</i> | <i>Low</i> | <i>Moderate</i> | <i>Strong</i> | <i>Negative</i> | <i>expression (%)</i> |
|------------------------------|----------|------------|-----------------|---------------|-----------------|-----------------------|
| Normal prostatic tissue      | 16       | 2          | 3               | 9             | 2               | 87.50                 |
| Benign prostatic hyperplasia | 22       | 4          | 2               | 12            | 4               | 81.82                 |
| Prostatic cancer tissue      | 32       | 2          | 1               | 0             | 29              | 9.36                  |

$\chi^2 = 39.034$ ,  $P < 0.01$  represent significant difference among the three groups. There is no obvious difference between normal prostatic tissue group and benign prostatic hyperplasia ( $\chi^2 = 0.0006$ ,  $P > 0.05$ ), while there is a significant statistical difference between normal prostatic tissue group and prostatic cancer tissue ( $\chi^2 = 25.14$ ,  $P < 0.01$ ). There is also a significant difference between benign prostatic hyperplasia and prostatic cancer tissue ( $\chi^2 = 25.83$ ,  $P < 0.01$ ).

**Supplemental Table 4 Proliferation and apoptosis of cancer cells (mean±s.e.)**

| <i>Group</i>         | <i>PI (%)</i> | <i>AI (%)</i> |
|----------------------|---------------|---------------|
| Mock                 | 81.2±7.4      | 2.9±1.0       |
| psi-Survivin         | 26.2±4.5**#   | 14.2±7.4*#    |
| pGRIM-19             | 29.9±5.6**#   | 11.2±6.8*#    |
| pGRIM-19-si-Survivin | 9.4±2.9**     | 27.9±7.2**    |
| psi-Scramble         | 72.8±6.3      | 5.5±3.4       |

Abbreviations: AI, apoptosis index; PI, proliferation index.

\* $P<0.05$ , \*\* $P<0.01$  versus psi-Scramble; # $P<0.05$  versus pGRIM-19-si-Survivin.



Supplement: aja2011179x1.pdf [file aja2011179x1.pdf]
